# Supplementary material for: A dibenzo-16-crown-5 fluoroionophore for selective emission ratio sensing of Na+ in basic aqueous dioxane solution †
Source: Royal Society of Chemistry journal article supplement (doi:10.1039/a909638h), 2000-01-01
Supplement: a909638h.doc [file a909638h.doc]

# Supplementary Data

**A dibenzo-16-crown-5 fluoroionophore for selective emission ratio sensing of Na+ in basic aqueous dioxane solution**

**Takashi Hayashita,*a Shinichiro Taniguchi,a Yoshihiko Tanamura,a Tatsuya Uchida,a Seiichi Nishizawa,a Norio Teramae,*a Yong Suk Jin, b Jong Chan Lee,b and Richard A. Bartschc**

a*Department of Chemistry, Graduate School of Science, Tohoku University, Aoba-ku, Sendai 980-8578, Japan*

b*Department of Chemistry, Chung-Ang University, Seoul 156-756, Korea*

c*Department of Chemistry and Biochemistry, Texas Tech University, Lubbock, Texas 79409-1061, USA*

**Determination of binding constant:**

The 1:1 binding constant of **1** for Na+ is calculated from a Benesi-Hildebrand plot analysis.a On the assumption that the fluorescence change is only induced by the formation of a 1:1 complex between **1** (L) and metal ion (M), the fluorescence intensity (*I*) can be expressed by the following equations:

*I* = L[L] + ML[ML] (A-1)

[Lt] = [L] + [ML] (A-2)

where L and ML are the fluorescence quantum yields for **1**, and  denotes the instrumental constant including the excitation light intensity and the molar absorptivity of **1**. From these equations, the Benesi-Hildebrand type equation (A-4) can be derived as,

The double-reciprocal plots of fluorescence intensity recorded at 387 nm and 459 nm as a function of Na+ concentration according to equation (A-4) are shown in Fig. A. All plots show linear relationship with correlation coefficients of higher than 0.995, and the 1:1 binding constant is obtained from the following equation,

*K* = (y-intercept)/(slope) (A-6)

We have repeated this experiment twice under the same experimental condition, and obtained the average binding constant value of 21917 (M-1).

Reference (a) K. A. Connors, *Binding Constants*; Wiley, New York, 1987, pp. 147-187.
